# Supplementary material
Source: PubMed Central journal article supplement (PMC5206906)
Supplement: NIHMS838308-supplement-supplement_1.pdf [file NIHMS838308-supplement-supplement_1.pdf]

**Supplemental Appendix: Table 1. Reports of ruptured tendons in AAS users or suspected AAS users**

**A. Cases with acknowledged AAS use**

| Study                       | Tendon <sup>a</sup>            | Age, yrs <sup>b</sup> | AAS Use      |              | Activity at time of injury                   | Prodromal symptoms?                                                                                       | Comment                                                                                                                                                                     |
|-----------------------------|--------------------------------|-----------------------|--------------|--------------|----------------------------------------------|-----------------------------------------------------------------------------------------------------------|-----------------------------------------------------------------------------------------------------------------------------------------------------------------------------|
|                             |                                |                       | Duration     | Current?     |                                              |                                                                                                           |                                                                                                                                                                             |
| Hill et al., 1983           | L Quadriceps                   | 24                    | Several yrs  | Yes          | Weightlifting                                | None mentioned                                                                                            | Pt. also had "minor rupture" of R quadriceps, treated conservatively; this may have been a muscle tear rather than a tendon tear.                                           |
| Kramhoft & Solegaard, 1986  | Ext pollicis longus            | 42                    | 4 mo         | NS           | Weightlifting                                | Two months of wrist pain prior to tendon rupture.                                                         |                                                                                                                                                                             |
| Herrick & Herrick, 1987     | L Triceps                      | 32                    | NS           | No           | Weightlifting                                | Ulnar neuritis plus triceps tendonitis and bursitis for several months prior to rupture.                  |                                                                                                                                                                             |
| Bach et al., 1987           | L Triceps                      | 33                    | NS           | Yes          | Weightlifting                                | Arm weakness for 28 mo prior to evaluation                                                                | The patient also exhibited a probable R partial bicep tendon rupture                                                                                                        |
| Stannard & Bucknell, 1993   | Triceps                        | 35                    | > 5 yrs      | No           | Weightlifting                                | Olecranon bursitis for 18 mo prior to injury, treated with 6 corticosteroid injections.                   | Corticosteroid injections may have contributed to tendon vulnerability (see Lambert et al., 1995 [ref]).                                                                    |
| Visuri & Lindholm, 1994     | Bilateral biceps               | 22                    | 6 yrs        | NS           | Lifting object; boxing                       | None mentioned                                                                                            | Pt. tore both biceps tendons on separate occasions 9 months apart                                                                                                           |
| David et al., 1995          | Bilat quadriceps               | 32                    | > 10 yrs     | NS           | Weightlifting                                | None mentioned                                                                                            | Pt. tore both quadriceps tendons simultaneously while squatting 400 lbs.                                                                                                    |
| Liow & Tavares, 1995        | Bilat quadriceps               | 29                    | NS           | No           | Jump                                         | "...pain in the quadriceps tendon prior to this injury"                                                   | Pt. ruptured both quadriceps tendons simultaneously after jumping from 15 feet.                                                                                             |
| Evans et al., 1998: case 1  | Biceps + triceps               | 38                    | 10 yrs       | Yes          | Weightlifting                                | None mentioned                                                                                            | Pt had distal biceps plus bilateral triceps tendon ruptures in 2 separate injuries 6 mo apart.                                                                              |
| Evans et al., 1998: case 2  | Biceps                         | 31                    | 1 yr         | Yes          | Lifting object                               | None mentioned                                                                                            |                                                                                                                                                                             |
| Sollender et al. (4 cases)  | Triceps                        | NS <sup>c</sup>       | NS           | NS           | Batting baseball; weightlifting <sup>d</sup> | Two pts. had received corticosteroid injections in elbow for "tendonitis" several weeks prior to rupture. | Only one case presented in detail; this man ruptured his contralateral triceps tendon 4 mo after the initial rupture. Note possible role of corticosteroids in 2 cases.     |
| Cope et al., 2003 (3 cases) | Biceps                         | 39-44                 | See comments | See comments | Lifting object (2) Weightlifting (1)         | None mentioned                                                                                            | All 3 pts. are described as "high-demand bodybuilders," but only 1 admitted to AAS use. It is likely that the other 2 pts had surreptitiously used AAS as well.             |
| Lewis et al., 2005          | Bilat quadriceps               | 35                    | 6 yrs        | NS           | Weightlifting                                | Arthroscopy of R knee for "suspected meniscal pathology" 12 wks prior to tendon rupture                   |                                                                                                                                                                             |
| Isenberg et al., 2008       | Achilles + patellar            | 29                    | 3 yrs        | Yes          | Soccer, weightlifting                        | None mentioned                                                                                            | Pt. ruptured both achilles tendons and one patellar tendon within an 18-mo time span.                                                                                       |
| März & Novotný, 2008        | Quadriceps, pectoralis, biceps | 25                    | 11 mo        | See comments | Carrying load, Weightlifting                 | Shoulder soreness prior to pectoralis rupture; no prodromal symptoms prior to the other two ruptures.     | The patient took six 8-week courses of AAS over a span of several years; it is unclear whether he was actually on AAS at the times of his three successive tendon ruptures. |

**B. Cases with likely AAS use not explicitly acknowledged**

|                       |                    |       |              |              |                                   |                |                                                                                                                                                                                    |
|-----------------------|--------------------|-------|--------------|--------------|-----------------------------------|----------------|------------------------------------------------------------------------------------------------------------------------------------------------------------------------------------|
| Sherman et al., 1984  | Triceps            | 34    | See comments | See comments | Fall                              | None mentioned | Pt not explicitly asked about AAS use, but described as "professional bodybuilder."                                                                                                |
| Budoff & Gordon, 2000 | R Latissimus dorsi | 29    | See comments | See comments | Fall from ladder                  | None mentioned | Although pt denied AAS use, he is described as a "professional bodybuilder" who bench-pressed 560 lbs, suggesting surreptitious AAS use.                                           |
| Battista et al., 2003 | R Achilles         | 33    | See comments | See comments | Basketball                        | None mentioned | Pt. claimed only androstenedione use, but his weight of 230 lbs at 71" height suggests surreptitious AAS use. Notably, patient reported rupture of L achilles about 18 mo earlier. |
| Äärimaa et al., 2004  | Pectoralis         | 21-35 | NS           | NS           | Weightlifting (11) Gymnastics (1) | None mentioned | Retrospective survey of 33 cases of ruptured pectoralis tendons, of whom 12 cases were listed as "steroid suspicion."                                                              |

**Abbreviations:** AAS - anabolic-androgenic steroids; NS - not specified

<sup>a</sup> In all cases, "pectoralis" = pectoralis major, "biceps" = biceps brachii, and "triceps" = triceps brachii.

<sup>b</sup> In cases where an individual sustained more than one tendon rupture, the age at the time of the first episode is supplied.

<sup>c</sup> All 4 cases described as "middle-aged men."

<sup>d</sup> The one man described in detail ruptured one tricep tendon batting a baseball and the contralateral triceps tendon in a fall; at least one of the other 3 men appears to have ruptured his tendon while weightlifting; details on the other men are not given.
